# Supplementary material for: Amperometric Formaldehyde Sensor Based on a Pd Nanocrystal Modified C/Co2P Electrode
Source: Hindawi journal article supplement (doi:10.1155/2017/2346895), 2017-01-01
Supplement: f1 [file 2346895.f1.docx]

**Supplementary Information for**

"Amperometric Formaldehyde Sensor Based on a Pd Nanocrystal Modified C/Co2P Electrode**"**

Huan Wang,1 Yaodan Chi,1,2  Xiaohong Gao,1 Sa Lv, 1 Xuefeng Chu,1 Chao Wang,1 Lu Zhou,1 and Xiaotian Yang1

1 Jilin Provincial Key Laboratory of Architectural Electricity& Comprehensive Energy Saving, Department of Materials Science, Jilin jianzhu University, Changchun 130118, China.

2 College of Electronic Science﹠Engineering, Jilin University, Changchun 130012, China.

* e-mail: hanyxt@163.com


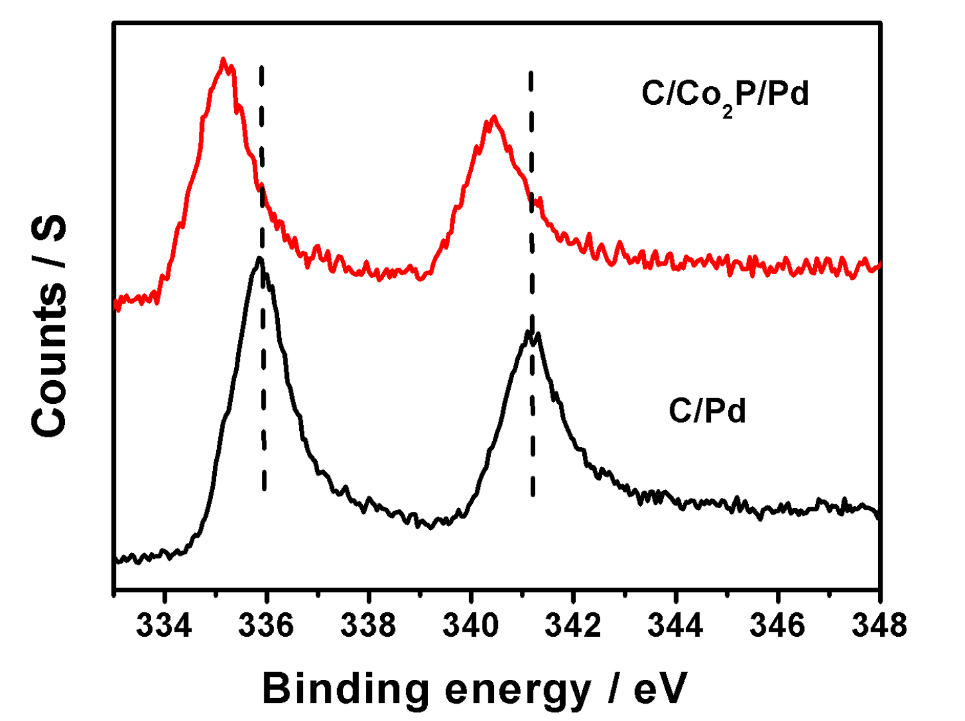


Figure S1 Compare to C/Pd (black line), the Pd3d5/2 and Pd3d3/2 peaks of C/Co2P/Pd (red line) shift from 335.8 and 341.2 eV to 335.2 eV and 340.4 eV respectively. This significant shift indicates that there may exist a strong electronic interaction between Co2P and Pd.


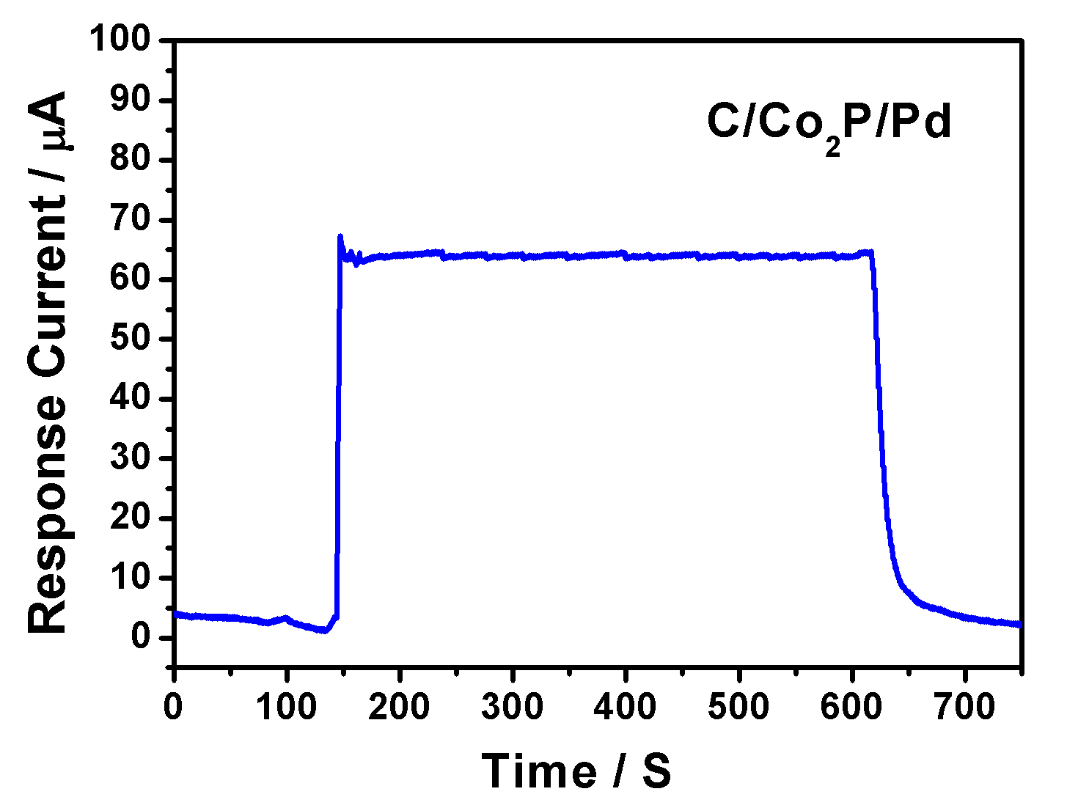


Figure S2 Amperometric current response of the C/Co2P/Pd composite based gas sensor continuously exposure to 10 ppm formaldehyde within 500 s. The amperometic response with long time test for the C/Co2P/Pd sensor was studied under continuous 10 ppm formaldehyde flow. No obvious decrease is observed in 500 s indicating the good stability of the C/Co2P/Pd sensor.
